# Supplementary material for: Effects of Ozone-Climate Interactions on the Temperature Variation in the Arctic Stratosphere
Source: Copernicus journal article supplement (doi:10.5194/egusphere-2024-2740), 2024-09-23
Supplement: Supplementary file [file egusphere-2024-2740-AC1-supplement.pdf]

# **Response to Referee's Comments**

**Manuscript ID: egusphere-2024-2740**

**Title: Effects of Ozone-Climate Interactions on the Long-Term Temperature Trend in the Arctic Stratosphere**

**Author(s):** Siyi Zhao, Jiankai Zhang, Zhe Wang, Xufan Xia and  
Chongyang Zhang

**February 2025**

## **Summary of revision in manuscript**

**We sincerely thank the reviewer for your important comments and assistance on our manuscript. The main revisions are summarized as follows:**

**1. Following the reviewer's suggestions, we created a 1980-clim experiment with an initial field set to fixed boundary conditions for 1980. The climatological mean ozone from the 1980-clim experiment is imported into the radiation scheme of the O3clm experiment. Then, we rerun the O3clm experiment.**

**2. The reviewers mentioned that only one experiment was unable to exclude the effect of interannual variability in the long-term trend. It was suggested that more ensemble experiments should be conducted. Therefore, we conducted five ensemble experiments for the control and O3clm experiments using different initial fields to ensure the robustness and reliability of the results in the revised manuscript.**

**3. A detailed description of the experiments has been added to the revised manuscript. Please see method section 2.3: Model and experimental configurations.**

**4. In order to better align the introduction with the long-term trends in stratospheric ozone and temperature, we have written the introduction**

## **Response to Comments of Reviewer #1**

I appreciate the authors efforts to isolate the impact of past Arctic ozone changes on trends in temperature and dynamics and to underline their findings with mechanical explanations. Unlike other studies, this study focuses on the extended winter season and might therefore extent our knowledge on the impacts of ozone changes from springtime to the whole winter season. However, I have doubts around the entire experiment setup (especially the way the ozone climatology is calculated) and think that the conducted simulations are not suitable to achieve the goal of this study. Moreover, the authors make use of a figure from another study without mentioning it.

**Response: We are sincerely grateful for the insightful comments and constructive suggestions provided by Reviewer #1. In response to the feedback from Reviewer #1 and the community, we have conducted new ensemble experiments and incorporated supplementary discussions with physical interpretations in relevant sections to enhance the manuscript's clarity. The introduction section has also been strengthened to better emphasize the significance of this study. We apologize for the extended review cycle due to the high computation costs of the ensemble experiments for control and O3clm experiments.**

### **Main comment #1:**

More details should be provided on the ozone climatology that is used in the O3clim experiments. Are these daily or monthly means? 3D or zonal mean? If I understand it correctly from Fig. 1, then the ozone chemistry is still calculated in the O3clim setup, but it is not radiatively active. This information is missing in the experiment description in lines 179. How many ensemble members were simulated? Moreover, Fig. 1 is identical to Fig. 1 from Friedel et al. (2022b) and the caption accompanying this figure is almost identical to the caption of Fig. 1 in Friedel et al. (2022a). This must be cited!

**Response: We thank the reviewers for your comments. We have expanded the experimental description in the main text and incorporated their suggestions. In the previously submitted manuscript, we used one ensemble experiment, and for**

the robustness of the experimental results and at the same time to reduce the uncertainty in the effects of ozone-climate interactions, in the revised manuscript we added five ensemble experiments for the new control experiment and the new O3clm experiment. Ensemble members have identical boundary conditions and radiation scheme, but with different initial conditions, which account for the internal variability of the climate system. We have added this specific information in the revised manuscript. Here is revised text as follows (Please see lines 244-261 in the revised manuscript):

*“To understand the causality of the ozone-circulation coupling, we perform model experiments to isolate the impact of ozone changes on stratospheric dynamics and circulation. Two groups of ensemble climate model experiments (i.e., the control experiment and O3clm experiment) use identical boundary conditions and initial conditions. Each group simulation consists of 5 ensemble members, with initial temperature conditions randomly perturbed. Both of the two experiments run from 1970–2020, and the first 10 years are the spin-up time. The control experiment uses fully interactive ozone chemistry, and long-term stratospheric ozone changes are involved in the radiation scheme. In contrast, in the O3clm experiment, the climatological mean ozone is represented by monthly 3-dimensional mean data from a 1980-clim experiment, which is imported into the radiation scheme. In the 1980-clim experiment, surface emissions, external forcing, stratospheric aerosols, fixed lower boundary conditions, and the solar photon enerspectra are all fixed at 1980. The 1980-clim experiment runs for 40 years with the first 10 years as spin-up time and the remaining 30 years of data are used to drive the radiation scheme of the O3clm experiment. This results in the production of fixed radiative feedback, which is to say that the ozone-climate interactions over a long period are not radiatively active. Meantime, this setting is designed to preserve the seasonal temperature variations that conform to the background environmental conditions of the Earth and ensure stable operation of the experiment. Thus, the comparison between the ensemble mean of control and O3clm experiments isolates the feedback effects of*

*long-term stratospheric ozone changes on atmospheric temperature and circulation from climate variability. Figure 1 (adapted from Friedel et al. 2022a, 2022b) provides the inspiration for the experimental design, which is crucial to understanding the analysis presented in this study.”*

In addition, we sincerely apologize for the omission of Figure 1 in the original manuscript, which is similar to Figure 1 in Friedel et al. (2022b). We acknowledge that this figure is similar to Friedel et al. (2022b) and needs to be cited. In the revised manuscript, we have written the experimental design diagram for better understanding of the purpose of the experimental design. Furthermore, we have cited Friedel et al. (2022a; 2022b) to acknowledge their original work and contribution (see lines 264-268):

*“Figure 1 Simulation setup of the ensemble control and O3clm experiments. The control experiment treats ozone chemistry fully interactively. That is, the calculated ozone field has direct feedback on the atmosphere via the model radiation scheme. In contrast, the ensemble O3clm experiments do not use interactively calculated ozone in the radiation module. Instead, the radiation module uses an ozone climatology, which is derived from the 1980-clim experiment (see Method text) (This figure adapted from Fig. 3a in Friedel et al., 2022a and Fig.1 in Friedel et al., 2022b).”*

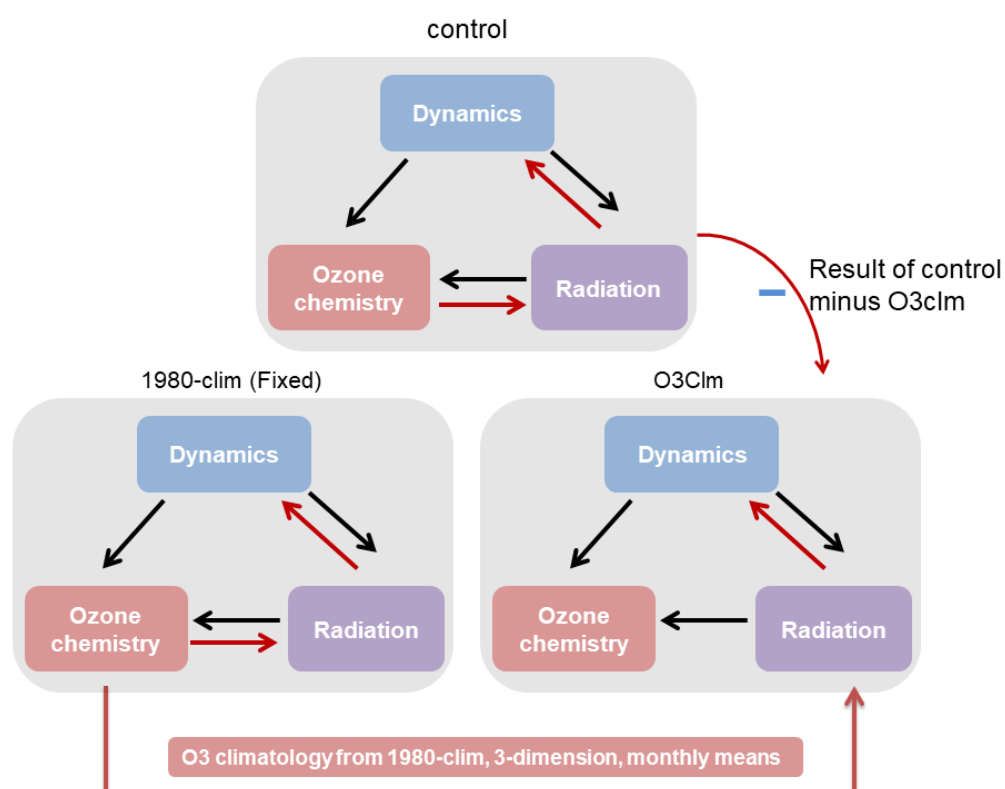

**Figure R1. Simulation setup of the ensemble control and O3clm experiments.** The control experiment treats ozone chemistry fully interactively. That is, the calculated ozone field has direct feedback on the atmosphere via the model radiation scheme. In contrast, the ensemble O3clm experiments do not use interactively calculated ozone in the radiation module. Instead, the radiation module uses an ozone climatology, which is derived from the 1980-clim experiment (see Method text) (This figure adapted from Fig. 3a in Friedel et al., 2022a and Fig.1 in Friedel et al., 2022b).

## **Main comment #2:**

If I understand the experiment design correctly, I believe that the conducted simulations are not suitable to study the impact of past ozone changes on trends in temperature and dynamics. The authors contrast one simulation with fully interactive ozone for the period 1980-2020 against a simulation where they impose an ozone climatology calculated over this period. Then, they contrast trends from 1980-2000 in the two

simulations to isolate the effect of ozone changes during that period on the variables of interest. I believe that this experiment design does not allow to disentangle the effect of past ozone changes, as the climatology was calculated over a period that includes ozone trends. Therefore, the ozone climatology used in the O3clim run might show lower ozone concentrations (due to an ozone decline from 1980-2000) than the ozone field in the ctrl run in 1980. Hence, at the starting point of the simulations (i.e. 1980), the circulation/temperature and ozone field are not consistent in the O3clim simulation. Therefore, temperature changes might arise to adjust to the lower ozone concentrations and trends in this simulation cannot solely be attributed to dynamical and thermodynamical processes other than ozone. Moreover, with the approach used here, effects of potential long-term ozone changes and interannual ozone changes are mixed, since they are both disabled in the O3clim experiments. When only using one ensemble member of 20 years, the role of interannual ozone variability is likely not negligible.

In order to achieve the goal posed by this study, I suggest first deriving an ozone climatology using a time-slice simulation with fixed boundary conditions (i.e. CFCs, GHGs,...) of the year 1980 with fully interactive ozone. The ozone climatology calculated this way can then be used to simulate the O3clim experiments from 1980-2000. Using this approach, the authors would be able to attribute changes in dynamics and temperature over this period to changes in ozone. However, more than one ensemble member for the transient runs would be necessary in order to isolate the effect of longterm ozone changes rather than the effect of interactive ozone variability.

**Response: Thank you for your detailed and thoughtful comments. The reviewer pointed out that the ozone climatology used in the current O3clm simulation may have been influenced by the negative trend in ozone during the 1980–2000 period. In the revised manuscript, we first conducted a 1980 ozone climatology experiment (1980-clim experiment) using 1980 fixed boundary conditions. The detailed information of experimental setup has been given in Major comment #1. The ozone output from the new O3clm experiment can reflect a stable baseline without ozone long-term trends, ensuring consistency between the ozone field in the O3clm**

experiment at the start of the transient run and the circulation and temperature fields. It also removes the potential influence of long-term negative trends on the stratospheric circulations. We compare the climatological ozone from the 1980-clim experiment with the ozone from the control experiment in the original manuscript. The climatological ozone differences between the 1980-clim experiment and the control experiment for 1980–2020 and for different seasons are given in Figure R2. Note that the climatological ozone from the control experiment, that is used to force the old O3clm experiment in the previous manuscript, is lower than that in the 1980-clim experiment, imply a potential effect of negative ozone trend in the old O3clm experiment. Therefore, in the revised manuscript, we use the climatological ozone with seasonal cycle derived from the 1980-clim run as the ozone input field for the new O3clm experiment to exclude the effect of a negative ozone trend.

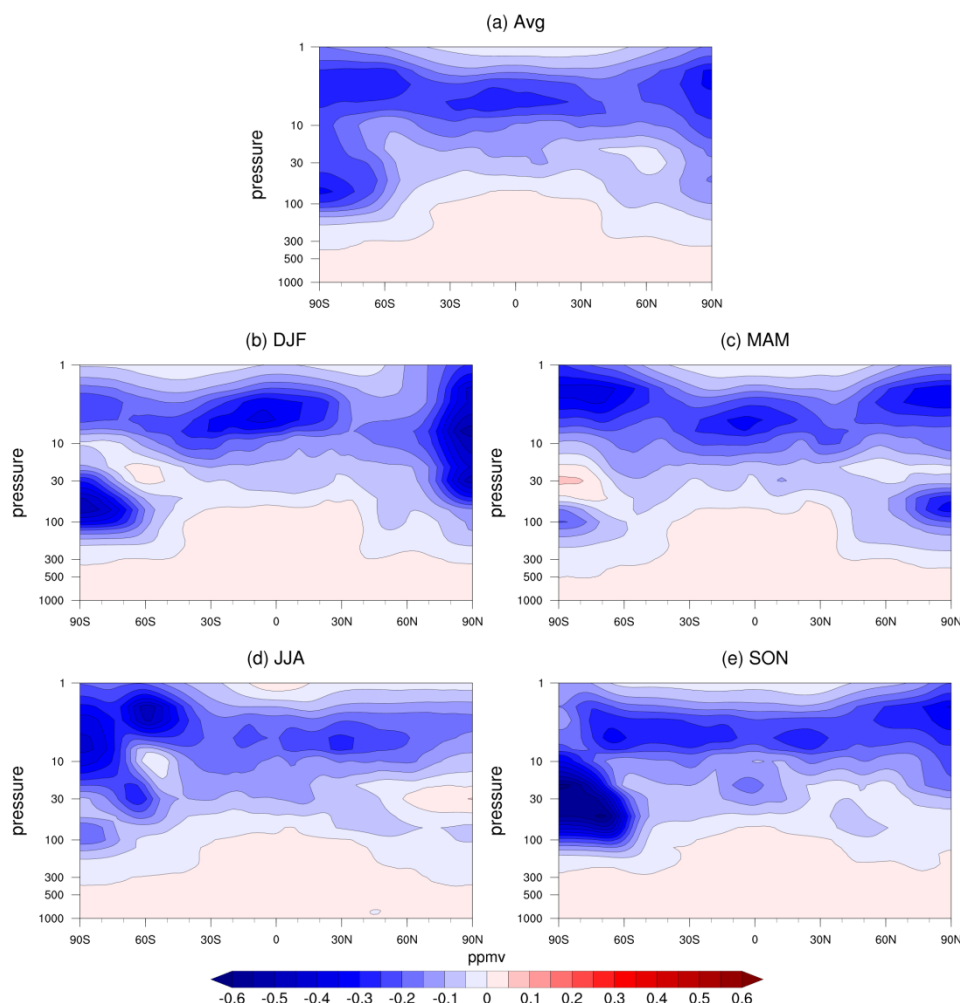



**Figure R2. Differences in the climatological ozone (unit: ppmv) between the 1980-clim experiment of which climatological ozone forces the new O3clm experiment, and the control experiment of which climatological ozone forces the old O3clm experiment, shown for the annual mean (a), winter mean (December–February) (b), spring mean (March–May) (c), summer mean (June–August) (d), and autumn mean (September–November) (e).**

The new O3clm experiment was also compared with a fully interactive ozone simulation (the control experiment) to accurately isolate the effects of ozone changes on temperature and its long-term trend. The reviewers suggested that the role of interannual ozone change may not be negligible. Therefore, in order to isolate the effects of long-term ozone trend from interannual ozone variability, we increased the number of ensemble members both for the control experiments and the O3clm experiments up to five, reducing the influence of interannual variability in the trend analysis. We have focused on analyzing the effects of long-term ozone changes on the temperature trend using the ensemble mean of the 5 ensemble members.

Figures R3 and R4 give the normalized time series and linear trends in Arctic stratospheric temperatures for different periods (before 2000 and after 2000) from early winter to early spring, with mean values ranging from 10 to 150 hPa. The control experiment in the original manuscript shown in Fig. R3 (hereafter referred to as ‘old control experiment’) is one ensemble member of the 5 ensemble control experiments, while Fig.4 shows the ensemble mean of the control experiments. A comparison of Fig.3 and Fig.4 (one ensemble member and ensemble mean of 5 members) shows that the added ensemble experiments do not substantially change the Arctic stratospheric temperature trend. From November to December, the Arctic stratospheric temperature from both the MERRA-2 and ERA5 reanalysis

datasets show a small positive trend before 2000 and an insignificant negative trend after 2000 (Figs. R3a, R4a; black line for MERRA-2 and grey line for ERA5). This suggests a warming trend in the Arctic stratosphere during early winter before 2000 and a cooling trend after 2000. The ensemble mean of the control experiments reproduce these opposite trends well, with a significantly positive trend in temperature before 2000 and a significantly negative trend after 2000 (Figs. R3a, R4a; purple line). From January to February, the temperature displays an insignificant negative trend before 2000 in the old control experiment (Fig. R3b) and a significant negative trend after 2000 in the ensemble control experiments (Fig. R4b). From March to April, the temperature from all three datasets shows a significant negative trend before 2000, while there is no significant trend after 2000 in the ensemble mean of the control experiments and the old control experiment (Figs. R3c, R4c). Overall, the long-term trends in temperature derived from the ensemble mean of control experiments are nearly consistent with the results of the reanalysis datasets, both in the period before 2000 and after 2000. In addition, the results of the ensemble mean of control experiments are similar to those of the previous control experiment in the original manuscript, but the ensemble mean of control experiments is able to exclude the internal variability of the climate system; therefore, we use the ensemble mean of the control experiments in the revised manuscript.

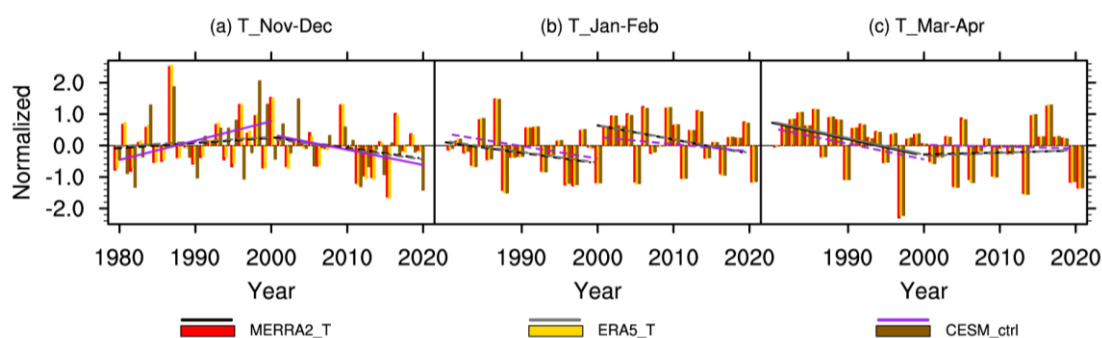

**Figure R3.** Normalized time series of the temperature averaged from 150 hPa to 10 hPa over 65°–90°N from 1980–2020 in (a) November–December, (b) January–February, and (c) March–April derived from the MERRA-2 (red column), ERA5

(orange column) reanalysis dataset and CESM control experiments used in the original manuscript (brown column). The color straight lines represent the linear trends during the pre-2000 and post-2000 periods. Solid lines indicate that the trends are statistically significant at the 90% confidence level according to Student's  $t$  test. This is Figure 2 in the original manuscript.

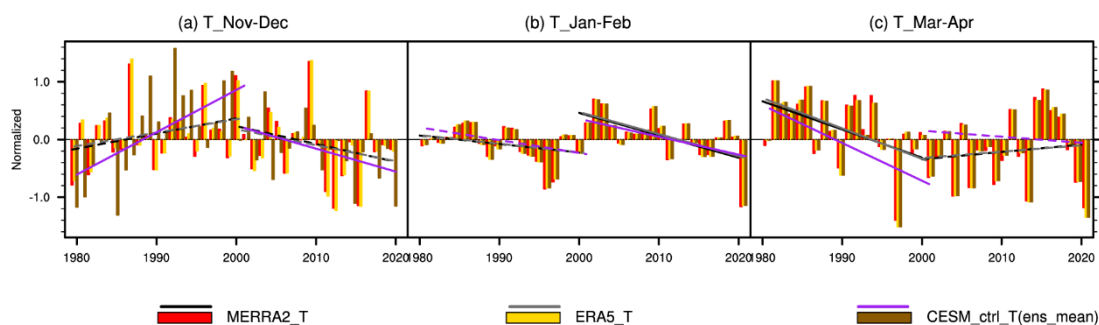

**Figure R4.** Same as Figure R3, but derived from the ensemble mean of the control experiments. This is Figure 2 in the revised manuscript.

Figure R5 shows the trends in daily temperature and ozone between 10 and 250 hPa in the polar cap regions ( $65^{\circ}$ – $90^{\circ}$ N) during the pre-2000 period, which are based on data from MERRA-2 and the control experiments. Fig. R5c, R5d shows the results derived from the old control experiment in the original manuscript, while Fig. R5e, R5f shows the results of the ensemble mean of the control experiments. The trend reversal is also evident in December, which is consistent with Figs. R3 and R4. During November and December, there is an increasing trend in both temperature and ozone across all levels in the old control experiment (Fig. R5a, R5b). While after December, the trends in temperature and ozone reverse in the middle stratosphere and then in the lower stratosphere. Similar trend patterns are found in the old control experiment (Fig. R5c, R5d) and the ensemble control experiments (Fig. R5e, R5f), indicating that the ensemble control experiments can reproduce the long-term trends in stratospheric temperature and ozone in both early and late winter. In summary, the additional ensemble members do not affect the trends in Arctic stratospheric temperature.

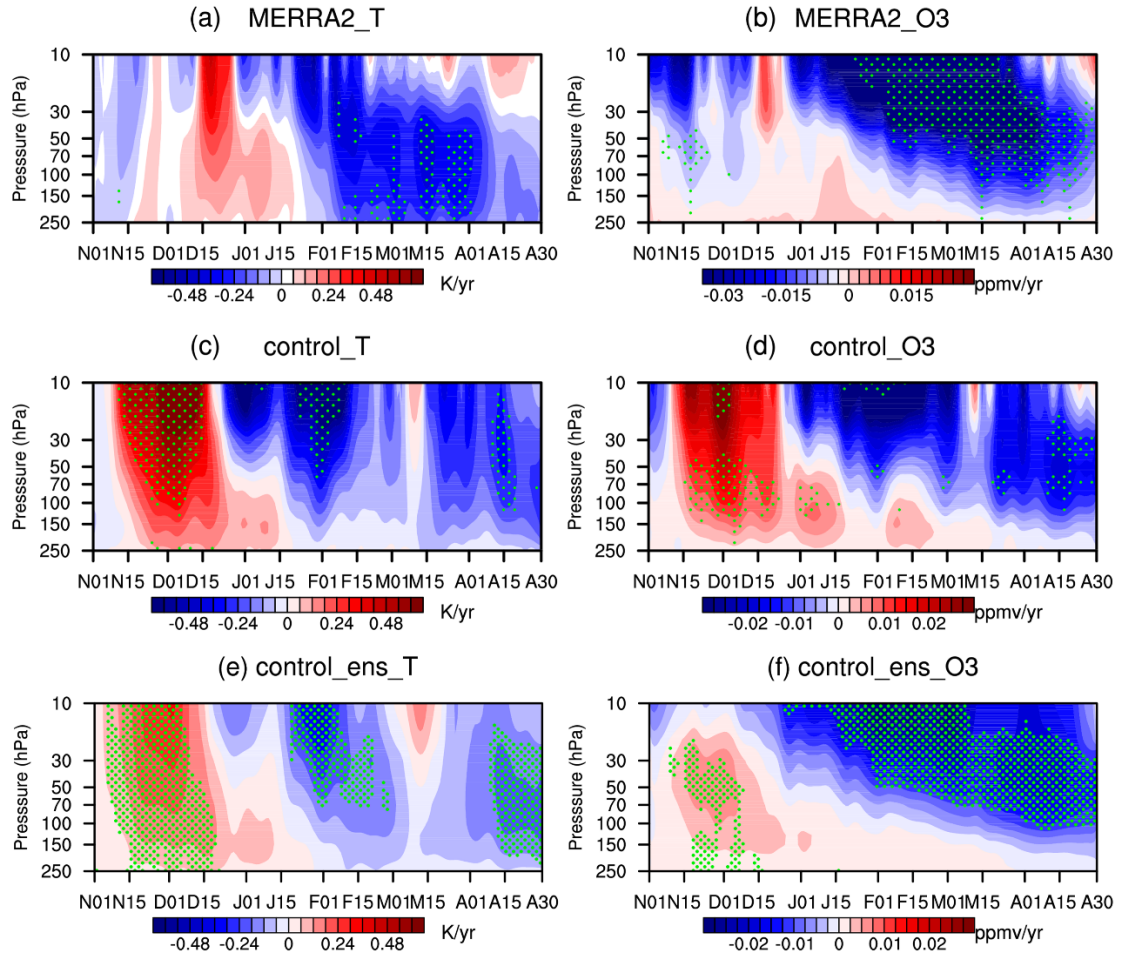

**Figure R5.** Time evolution of trends in daily temperature (a, c and e) and ozone (b, d and f) in the polar cap regions ( $65^{\circ}$ – $90^{\circ}$ N) during winter and spring derived from MERRA2 (a, b), the one ensemble of control experiment (c, d) and the 5 ensemble mean of the control experiments (e, f) in the pre-2000 period. The green dotted regions indicate that the trends are statistically significant at the 90% confidence level according to Student's  $t$  test. This is Figure 3 in the original manuscript.

Figure R6a, R6b show the daily trends in temperature and ozone between 10 and 250 hPa in the polar cap regions ( $65^{\circ}$ – $90^{\circ}$ N) before 2000 derived from the old O3clm experiment. The old O3clm experiment shows a nonsignificant temperature trend from November to December and a positive trend in late February and March. This result is opposite to those in the old control experiment (Fig. R5b, R5c). The stratospheric ozone exhibits negative trends over the 10–100

hPa from November to April, without an intra-seasonal reverse. The differences in trends of temperature and ozone between the old control experiment and old O3clm experiment are shown in Fig. R6c and R6d, which also shows an intra-seasonal reverse around December.

Figure R7a and R7b show similar trends to those in Figure R6a and R6b, except that the non-significant positive temperature trend from late February to early March became smaller and shorter in duration. The negative temperature trend in April is larger than those in the original manuscript but still insignificant. The ozone trend in the lower stratosphere is different from the previous results, as evidenced by a non-significant positive trend below 30 hPa in December and a negative ozone trend during January-April. It is worth noting that the ozone trend in late winter and spring derived from the new ensemble O3clm experiments still shows significant negative trends, which may be contributed by the chemical ozone depletion induced by increasing ODSs in the pre-2000 period (Fig. R7b). Conversely, the stratospheric ozone during February and early spring in the new O3clm experiment in the post-2000 period shows a significant positive trend (Fig. 13b in the revised manuscript), which is consistent with that in the old O3clm experiment in the original manuscript. This result suggests that the new O3clm experiment has excluded the potential impact of ozone decline as input field, which is the biggest concern of the reviewer #1. In addition, the difference in trends between the ensemble mean of the control and O3clm experiments is basically consistent with those in the original manuscript, except that the trend is smaller compared to the previous results, which is partially contributed by internal variability. These results indicate that the new control and new O3clm experiments with increased 5 ensemble members do not substantially affect the analysis results of the ozone-climate interaction feedbacks, although there is a weaker reduction in the strength of the trend in Arctic stratospheric temperature.

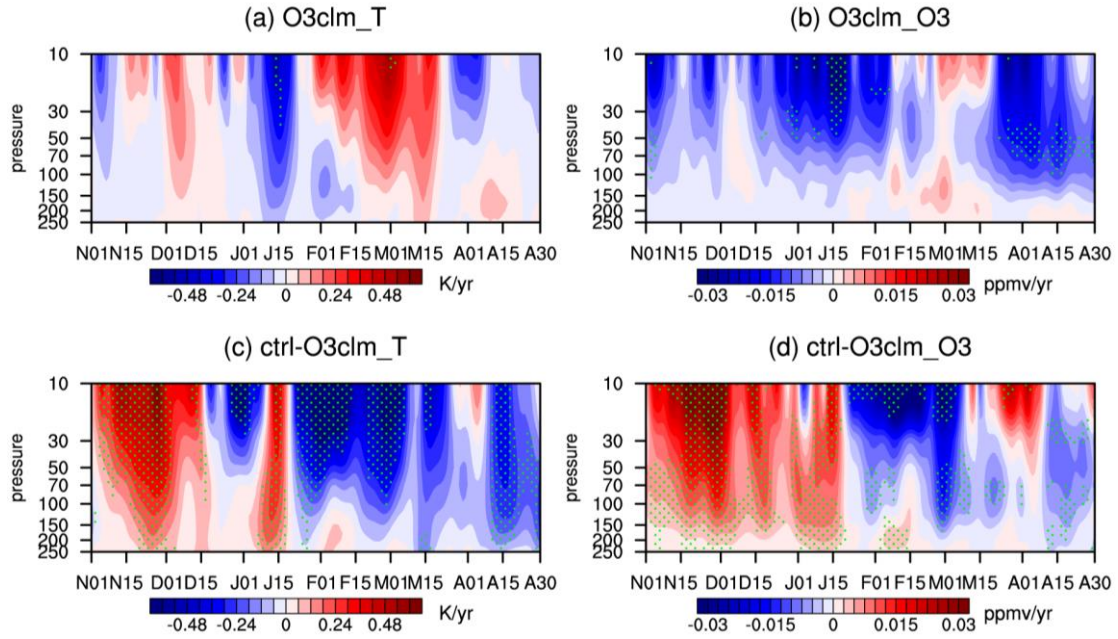

**Figure R6.** Time evolution of the trend of daily temperature and ozone over the levels between 10 and 250 hPa in the polar cap regions (65°–90°N) during winter and spring derived from the O3clm experiment (a–b) and the differences between the control experiment and O3clm experiment (c–d) before 2000. The green dotted regions indicate that the trend is statistically significant at the 90% confidence level according to Student's  $t$  test. This is Figure 4 in the original manuscript.

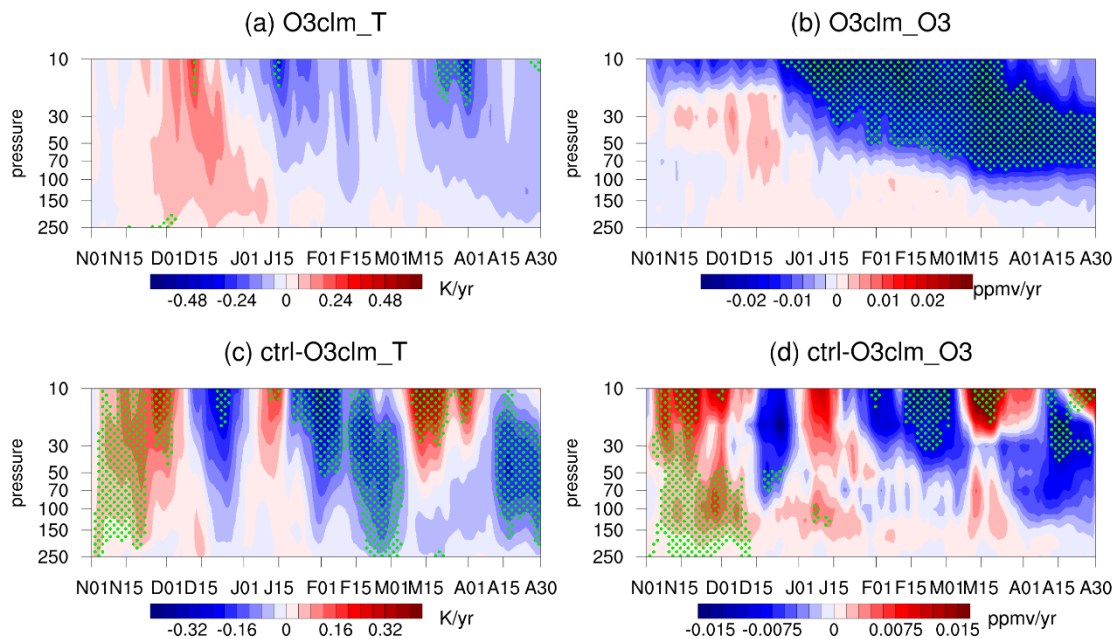

**Figure R7.** Same as Figure R6, but from the 5 ensemble mean of the O3clm

experiments and the difference between the ensemble mean of the control and O3clm experiments. This is Figure 4 in the revised manuscript.

The core process of ozone-climate interactions is ozone-circulation feedback. Figure R8 displays the trend in the vertical component downwelling branch of the BDC ( $\overline{w}^*$ ) averaged over the polar regions (65°–90°N) during the pre-2000 period in the ensemble control experiments and O3clm experiments. We decomposed these trends into contributions from wave 1 (Fig. R8b, e and h) and wave 2 (Fig. R8c, f and i). The ensemble mean of the control experiments shows significant negative trends in  $\overline{w}^*$  from November to early December, corresponding to enhanced downwelling compared to climatological mean, and positive trends in  $\overline{w}^*$  from late December to January, corresponding to weakened downwelling (Fig. R8a). After February, the trends in  $\overline{w}^*$  are less significant (Fig. R8a). The linear trends in  $\overline{w}^*$  are basically opposite to those in temperature derived from the ensemble control experiments (Fig. R5e), which is because the enhanced downwelling (upwelling) favors polar adiabatic warming (cooling). Additionally, the  $\overline{w}^*$  trend contributed by wave 1 is similar to the total trend, suggesting that wave 1 dominates the trends in  $\overline{w}^*$ . In the ensemble O3clm experiments, there is no negative trend in  $\overline{w}^*$  in November and early December (Fig. R8d–f). This result indicates that ozone-circulation feedback strengthens the  $\overline{w}^*$  in early winter, leading to adiabatic warming in early winter; conversely, there are anomalous upward motions that induce anomalous adiabatic cooling from January to February, which is consistent with the reversal of the temperature trend in January (Figs. R5, R7). The difference between the ensemble control and O3clm experiments suggests a similar pattern to that of the ensemble control experiments (Fig. R8g, h and i). The results from the ensemble mean of the control



experiments, O3clm experiments and the difference between the ensemble mean of the two experiments are consistent with those from the old experiments, indicating that the Arctic stratospheric temperature trends are indeed driven by ozone-climate interactions rather than internal variability. Overall, the results of the new ensemble experiments still support the intra-seasonal reverse in the trend in Arctic stratospheric temperature around early winter.

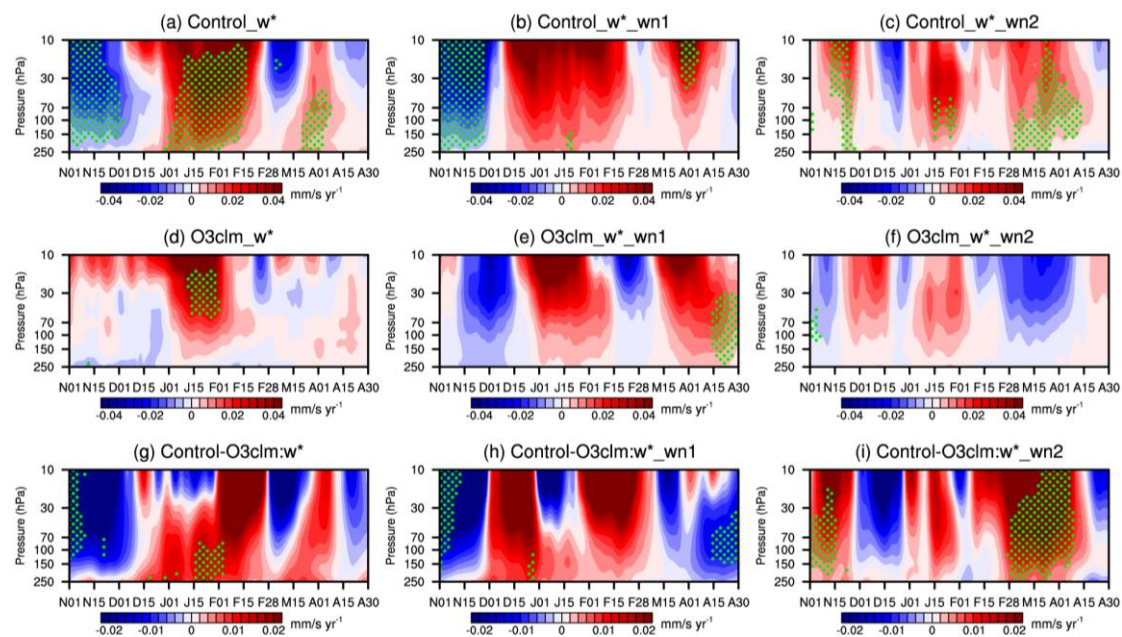

Figure R8. Linear trend of the vertical component ( $\overline{w^*}$ ) of the BDC and its contribution to the wavenumber 1 (b, e and h) and wavenumber 2 components (c, f and i) before 2000 averaged in the polar regions ( $65^{\circ}$ – $90^{\circ}$ N) during winter and spring, derived from the ensemble control experiments (a, b and c), O3clm experiments (d, e and f) and the differences between the ensemble mean of the control and O3clm experiments (g, h and i). The green stippled regions indicate the trend in  $\overline{w^*}$  significant at the 90% confidence level according to Student's  $t$  test (The daily data are first processed with a 30-day low-pass filter to remove high-frequency signals). This is Figure 5 in the revised manuscript.

Our new experiments also support the finding in the original manuscript that



enhanced the downwelling of BDC trends associated with ozone-climate interactions can be attributed to the upward planetary waves. Figure R9 shows the trends in stratospheric planetary wave activity over the subpolar regions (50°–80°N) from November to April. In the ensemble control experiments, there is a significantly positive trend in the waves entering the stratosphere in November and early December before 2000, which is accompanied by intensified wave flux convergence in the middle and lower stratosphere (approximately 10–100 hPa; Fig. R9a). However, in late December and January, the waves entering the stratosphere decrease, accompanied by weakened wave flux divergence. These features imply that stratospheric planetary wave activity strengthened in November and early December and weakened in late December and January during the pre-2000 period, which is consistent with the findings of previous studies (Bohlinger et al., 2014; Young et al., 2012). In contrast, in the ensemble O3clm experiments, waves entering the stratosphere in November and early December decrease, and there is no significant convergence trend before 2000 (Fig. R9d). The trends in the planetary wave are mainly contributed by the wave 1 component rather than by wave 2 (Fig. R9b, c, h, and i). In November and early December, more propagation of planetary into the stratosphere weakens the circumpolar westerlies and increases the temperature in the Arctic lower stratosphere, which is consistent with the enhanced downward motions shown in Fig. R8. The trends in E-P flux and its convergence in January and February are opposite to those in early winter. Overall, the changes in upward wave propagation and BDC make a major contribution to reverse the stratospheric temperature trend at the intra-seasonal timescale during winter. It is worth noting that the planetary wave activity only changes noticeably before February in the ensemble mean of control experiments and O3clm experiments, and then gradually weakens in spring. This suggests that dynamic feedback processes induced by ozone-climate interactions mainly occur in winter. The results of the ensemble mean of experiments do not change the turnaround change in the trend in planetary wave.

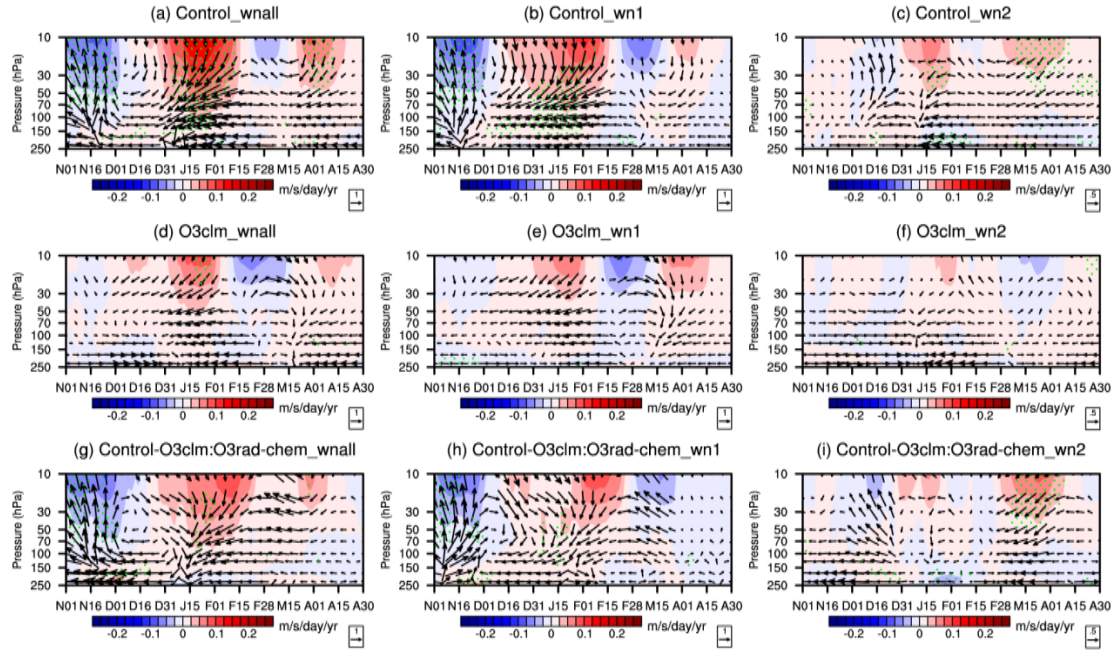

**Figure R9.** Trends in E-P flux (a, d and g; arrows; units of horizontal and vertical components are  $10^4$  and  $10^2 \text{ kg s}^{-2} \text{ yr}^{-1}$ , respectively; an arrow pointing to the right indicates poleward propagation, whereas an arrow pointing to the left indicates equatorward propagation) and its divergence (shading) with their wave 1 components (b, e and h) and wave 2 components (c, f and i) over the levels between 10 and 250 hPa before 2000 averaged in the subpolar regions ( $50^\circ$ – $80^\circ\text{N}$ ) during winter and spring, as derived from the ensemble control experiments (a–c), O3clm experiments (d–f) and the differences between the ensemble mean of the control experiments and O3clm experiments (g–i). The green stippled regions indicate the trend in the E-P flux divergence significant at the 90% confidence level according to Student's  $t$  test (The daily data are first processed with a 30-day low-pass filter to remove high-frequency signals). This is Figure 7 in the revised manuscript.

Figure R10 shows the evolution of trends in shortwave heating rate (referred to as the QRS) and longwave heating rate (referred to as the QRL) from November to April in the two experiments. Both the ensemble control and O3clm experiments reveal small QRS trends from November to mid-February because sunlight cannot

reach the Arctic regions. In the ensemble control experiments, the QRL heating from November to early December shows a negative trend corresponding to the longwave cooling effect. In contrast, in the ensemble O3clm experiments, the ozone-climate interactions are removed and there is no significant QRL trend. The QRL cooling in the ensemble control runs occurs because a warmer air parcel corresponding to the positive temperature trend in early winter emits more longwave radiation and hence cools faster. After February, the upward propagation of planetary waves and ozone-circulation feedback processes weaken, whereas the contribution of shortwave radiative processes to stratospheric temperature increases as sunlight reaches the Arctic region. The ensemble control experiments demonstrate that the QRS shows a significant negative trend during the ozone-depletion period, which leads to a lower temperature and an strengthened polar vortex (Brasseur and Solomon, 2005). However, in the ensemble O3clm experiments, the radiative effects of ozone-climate interactions are inactivated, leading to insignificant changes in QRS throughout the entire winter and spring. This result further suggests that the design of the new O3clm experiment is credible.

In addition, negative temperature anomalies (Figs. R4c, R5c and R5e) emit less longwave radiation. The temperature then increases and generates positive QRL anomalies in spring. The differences in QRS and QRL trends between the ensemble mean of control and O3clm experiments exhibit nearly same patterns as those in the original manuscript. Our results demonstrate that the ozone-climate interactions during early winter mainly influence stratospheric temperature through dynamic adjustments. In contrast, the trends in temperature during late winter and spring are primarily due to dynamic cooling and shortwave cooling. Overall, the results of the ensemble mean of the two experiments do not change the trend of QRL and QRS, which is consistent with the original manuscript.

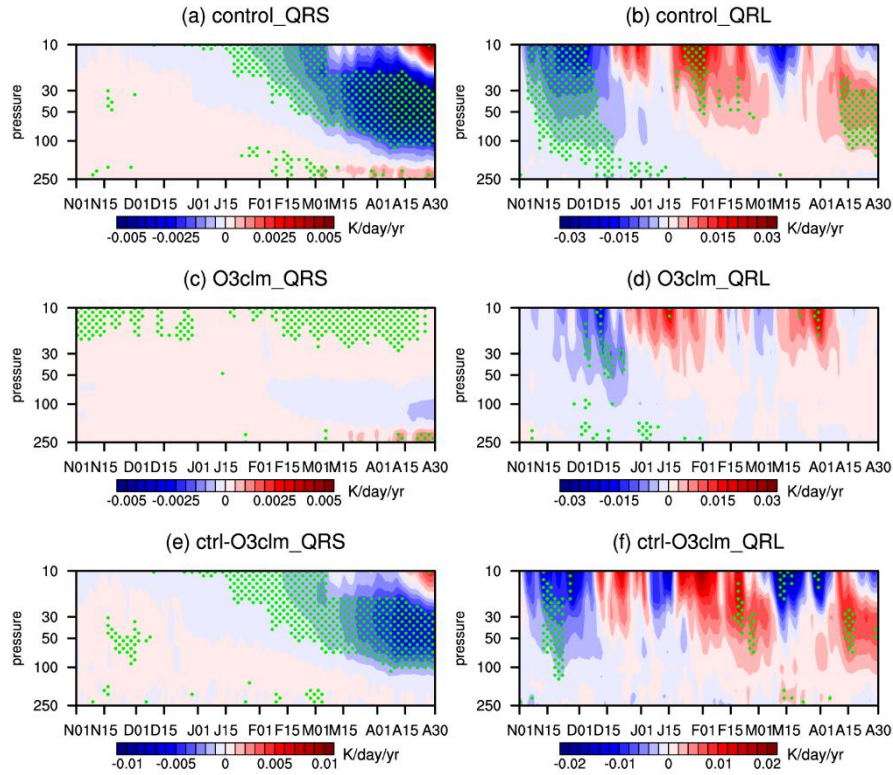

**Figure R10.** Time evolution of trends in the daily shortwave heating rate (solar heating rate; QRS) and longwave heating rate (QRL) between 10 and 250 hPa in the polar regions ( $65^{\circ}$ – $90^{\circ}$ N) during winter and spring derived from the ensemble mean of the control experiments (a, b), O3clm experiments (c, d) and the difference between the two experiments (e, f) before 2000. The green dotted regions indicate that the trends are statistically significant at the 90% confidence level according to Student's  $t$  test (Nine-point smoothing was performed during drawing to remove noisy signals). This is Figure 11 in the revised manuscript.

In summary, the new ensemble mean of the control experiments, O3clm experiments and the difference between the two experiments are consistent with those in the original manuscript, and a detailed explanation of the mechanism is given in Section 4 of the revised manuscript. Although we use a new initial field for the ozone climate state in the O3clm experiment, the effect of the ozone-climate interaction does not change substantially, practically noted that there still exists an intra-seasonal temperature reversal around early winter. Therefore, we

**conclude that the long-term trend in temperature and ozone is not affected by the initial field of the climate state. By redesigning the experiments and adding transient runs with 5 ensemble members, we have effectively addressed the issues raised by the reviewers and significantly improved the scientific validity and reliability of this study.**

**Other comments:**

The introduction does not follow a clear outline. Sometimes it is unclear whether the authors are referring to interannual or long-term processes. The introduction reviews mostly literature that focuses on ozone-climate coupling on interannual timescales, but then the study focuses on long-term trends. Please tailor the introduction a bit better to the aim of this study. Some of the statements made in the introduction are also not supported by the cited literature (see detailed comments below). The title of the study is also misleading, as it suggests that this study focuses on interannual variability rather than long-term trends.

**Response:** We thank the reviewers for their constructive comments on the introduction and title of the manuscript. The title of the revised paper has been changed into “*Effects of Ozone-Climate Interactions on the Long-Term Temperature Trend in the Arctic Stratosphere*”. Additionally, in order to better align the introduction with the long-term trends in stratospheric ozone and temperature, we have written the introduction and the following is the revised introduction (see lines 23-143):

*“The stratospheric ozone layer plays an important role in global climate change (Son et al., 2008; Smith and Polvani, 2014; Xia et al., 2016; Xie et al., 2018; Hu et al., 2019a; Sigmond and Fyfe, 2014; Chiodo et al., 2021; Ivanciu et al., 2022; Friedel et al., 2023). Its absorption of solar ultraviolet (UV) radiation, along with its strong infrared radiation (IR) absorption and emission around the 9.6  $\mu\text{m}$  band, is crucial for the Earth’s energy balance and the thermal structure of the atmosphere (de F. Forster and Shine, 1997). The annual global mean radiative forcing of stratospheric*

ozone during the strongest ozone depletion period (1979–1996) is relatively small ( $-0.22 \pm 0.03 \text{ W/m}^2$ ; de F. Forster and Shine, 1997) compared to that of  $\text{CO}_2$  ( $2.16 \pm 0.25 \text{ W/m}^2$ ; IPCC, AR5, 2014). However, in addition to the direct radiative forcing mentioned above, stratospheric ozone can also significantly impact atmospheric temperature through the ozone-climate interactions, which involve chemical-radiative-dynamical coupling processes (Dietmüller et al., 2014; Nowack et al., 2015). For instance, neglecting interactive stratospheric chemistry and considering only ozone's direct radiative effect in climate models result in 20% overestimation of surface temperature in scenarios with the quadrupled  $\text{CO}_2$  concentrations (Nowack et al., 2015). A similar overestimation of surface temperatures can also be found in the study of Chiodo and Polvani (2016). Additionally, Rieder et al. (2019) demonstrated that ozone-climate interactions are important for accurately capturing stratospheric temperature variability in models. However, some studies, such as Marsh et al. (2016), suggested that ozone-climate interactions have limited influences (approximately 1%) on climate sensitivity. Therefore, whether the ozone-climate interactions have significant influence on temperature variability is still unclear.

The ozone-climate interaction is complex, especially in the polar stratosphere. It involves different feedback mechanisms that vary across seasons. In winter, although solar radiation in the Arctic regions is absent, ozone can still absorb and emit longwave radiation. Seppälä et al. (2025) pointed out that a reduction in stratospheric ozone could directly lead to stratospheric warming. This longwave radiative warming may influence the strength of the Arctic polar vortex (Hu et al., 2015), further modulating the transport of ozone-rich air from mid-latitudes to the Arctic polar regions (Zhang et al., 2017). In addition, the Arctic ozone can modulate the planetary wave activity, which further influences Arctic stratospheric temperature via wave-mean flow interactions in winter (Nathan and Cordero, 2007; Albers and Nathan, 2013; Hu et al., 2015). Thus, Arctic stratospheric ozone affects stratospheric

*temperatures through its longwave radiative effects and dynamical processes during winter. In late-February and early spring, as solar radiation reaches high latitudes, the polar regions become warm compared to winter and the stratospheric polar vortex is weakened. However, from the perspective of climate, the increase in ozone depleting substances (ODSs) in the 20<sup>th</sup> century leads to springtime stratospheric ozone depletion and decreased absorption of shortwave radiation, which cools the Arctic stratosphere and strengthens the polar vortex (Friedel et al., 2022a). This results in reduced wave propagation towards the lower stratosphere and thereby a colder Arctic stratosphere (Coy et al., 1997; Albers and Nathan, 2013; Haase and Matthes, 2019). On the one hand, the strengthened Arctic polar vortex decreases ozone transport to the polar regions, further reducing ozone concentrations. On the other hand, a colder Arctic stratosphere facilitates the formation of polar stratospheric clouds (PSCs). PSCs provide sites for heterogeneous reactions. The reactions convert stable chlorine reservoir species into active chlorine, then catalytically destroys ozone (Solomon et al., 1986; Feng et al., 2005a, 2005b; Calvo et al., 2015). Therefore, the ozone-climate interactions in winter and spring involve different and complex chemical-radiative-dynamical feedback processes, which operate on different timescales (Tian et al., 2023).*

*The Arctic plays a crucial role in the global climate system, and its temperature changes have profound implications for global climate patterns (Cohen et al., 2014; Serreze and Barry, 2011; Overland et al., 2016). In recent decades, the Arctic long-term temperature trends are not only driven by a range of external factors such as sea ice, greenhouse gas emissions (GHG), and aerosols (IPCC, AR6, 2021; Shindell and Faluvegi, 2009; Screen and Simmonds, 2010), but also influenced by natural variability in the climate system. During the period from 1950 to 2000, in late-winter, a negative trend in stratospheric temperature is observed in the Arctic regions, which is associated with the weakening of wave activity (Randel et al., 2002; Zhou et al., 2001; Hu and Tung, 2003). On the other hand, the temperature trends in early and*

*mid-winter (November-January) are opposite to those in late winter from 1980 to 2000 (Bohlinger et al., 2014; Young et al., 2012). Most previous studies focused only on the role of dynamical processes in the seasonal difference in temperature trends (Newman et al., 2001; Hu and Fu, 2009; Young et al., 2012; Ossó et al., 2015; Fu et al., 2019). However, these long-term trends in Arctic temperatures are not fully explained by dynamical processes. A recent work by Chiodo et al. (2023) has explored the impact of long-term ozone trends on the temperature in the Arctic, providing valuable insights into the ozone-climate interactions. Notably, the Arctic ozone layer has also undergone significant changes over the past 40 years (WMO, 2018). The ozone layer experienced significant depletion after the Industrial Revolution (Farman et al., 1985) and has been recovering slowly in the 21st century as ODSs is decreased (WMO, 2018; Newman et al., 2007; Chipperfield et al., 2017). Additionally, the influence of ozone-climate interactions on temperature in polar regions differs across seasons (Tian et al., 2023). Therefore, it is worth investigating whether Arctic ozone trends and their climate interactions can explain the long-term trends in Arctic temperature across different seasons.*

*This study focuses on the historical long-term trends in the Arctic stratospheric temperature during winter and spring, with a particular emphasis on the role of ozone-climate interactions. Specifically, we seek to answer the following questions: (1) What are the observed trends in Arctic stratospheric temperature and ozone concentrations over recent decades? (2) How do ozone-climate interactions contribute to these trends? (3) What mechanisms drive the seasonal differences in these trends? By addressing these questions, this study aims to enhance our understanding of the role of ozone-climate interactions in long-term Arctic stratospheric changes and their implications for future climate projections. Section 2 outlines the data, methodologies, and climate model experimental designs employed in this study. Section 3 presents the observed trends in temperature and ozone concentrations over the Arctic stratosphere, and Section 4 explores the underlying*



*physical processes. Finally, section 5 summarizes the conclusions and discusses future directions.”*

Line 8: “increased”

**Response: Corrected, thank you.**

Line 15: “cooling trends in the Arctic stratosphere are ...”

**Response: Corrected, thank you.**

Line 35: Please be a bit more precise here. Marsh et al. (2016) conclude that ozone feedbacks are not crucial for the model’s climate sensitivity in 4xCO<sub>2</sub> forcing experiments. Maybe it is worth citing Rieder et al. (2019) in this context, who showed that ozone variations are important for the stratospheric temperature variability in models.

**Response: Thank you for your suggestion. We revised the text and provided additional context on the importance of ozone variations. The revised manuscript as follows (see lines 37-43):**

*“Additionally, Rieder et al. (2019) demonstrated that ozone-climate interactions are important for accurately capturing stratospheric temperature variability in models. However, some studies, such as Marsh et al. (2016), suggested that ozone-climate interactions have limited influences (approximately 1%) on climate sensitivity.”*

Lines 44: I could not find any evidence for this statement (i.e. the longwave ozone effect on stratospheric dynamics during winter) in the cited study (Strahan et al., 2013). Could you please provide further literature on the mid-winter longwave radiative effect of ozone?

**Response: We appreciate the reviewer pointing out this oversight. The revised sentence will read (see lines 47-61):**

*“In winter, although solar radiation in the Arctic regions is absent, ozone can still absorb and emit longwave radiation. Seppälä et al. (2025) pointed out that a reduction in stratospheric ozone could directly lead to stratospheric warming. This longwave radiative warming may influence the strength of the Arctic polar vortex (Hu et al., 2015), further modulating the transport of ozone-rich air from mid-latitudes to the Arctic polar regions (Zhang et al., 2017). In addition, the Arctic ozone can modulate the planetary wave activity, which further influences Arctic stratospheric temperature via wave-mean flow interactions in winter (Nathan and Cordero, 2007; Albers and Nathan, 2013; Hu et al., 2015). Thus, Arctic stratospheric ozone affects stratospheric temperatures through its longwave radiative effects and dynamical processes during winter.”*

Lines 47: Are you now talking about mid- or late-winter/spring? I believe this statement is only valid for springtime, when the polar vortex is already weakened. See also Haase and Matthes (2019).

**Response:** Thank you for highlighting this point. To address this, we revise the text for clarity and include a reference of Haase and Matthes (2019). The revised sentence is specified as (see lines 61-75):

*“In late-February and early spring, as solar radiation reaches high latitudes, the polar regions become warm compared to winter and the stratospheric polar vortex is weakened. However, from the perspective of climate, the increase in ozone depleting substances (ODSs) in the 20<sup>th</sup> century leads to springtime stratospheric ozone depletion and decreased absorption of shortwave radiation, which cools the Arctic stratosphere and strengthens the polar vortex (Friedel et al., 2022a). This results in reduced wave propagation towards the lower stratosphere and thereby a colder Arctic stratosphere (Coy et al., 1997; Albers and Nathan, 2013; Haase and Matthes, 2019). On the one hand, the strengthened Arctic polar vortex decreases ozone transport to the polar regions, further reducing ozone concentrations. On the other hand, a colder Arctic stratosphere facilitates the formation of polar stratospheric clouds (PSCs).*

*PSCs provide sites for heterogeneous reactions. The reactions convert stable chlorine reservoir species into active chlorine, then catalytically destroys ozone (Solomon et al., 1986; Feng et al., 2005a, 2005b; Calvo et al., 2015)."*

Line 85: I do not really understand this sentence (starting with "Lin et al. ... "). Could you please reformulate?

**Response:** In the revised manuscript we reorganized the introduction to focus more on the long-term trends in Arctic stratospheric temperature and the deletion of this sentence.

Lines 91 : Chiodo et al. (2023) studied the impact of long-term ozone trends in the Arctic on temperature and dynamics. Might be worth mentioning this here.

**Response:** Thank you for your comment. We have rephrased as follows (see lines 126-127):

*"A recent work by Chiodo et al. (2023) has explored the impact of long-term ozone trends on the temperature in the Arctic, providing valuable insights into the ozone-climate interactions."*

(9)Lines 94 . "..., we focus on the historical long-term trends ..."

**Response:** Corrected, thank you.

Lines 202: To support this statement on the persistent cooling, you would have to calculate a trend over the whole time period. When doing this, you would probably get no trend, e.g. no significant temperature changes from 1980-2020.

**Response:** Thank you for your attention to detail. There is no evidence of sustained cooling, so we modified the expression as follows (see lines 280-282):

*"From January to February, the temperature displays an insignificant negative trend*

*before 2000 and a significant negative trend after 2000, derived from the three datasets (Fig. 2b)."*

Fig. 2: How have the time series been normalised?

**Response:** In this study, the normalized time series are standardized using Z-score standardization, where the data are processed using the following formula:

$$A_{s-value} = \frac{A_{o-value} - \bar{A}}{\sigma_A}, \text{ where } A_{s-value} \text{ denotes the normalized A-value, } A_{o-value}$$

denotes original A-value,  $\bar{A}$  denotes average A-value,  $\sigma_A$  denotes standard deviation. This method transforms the data into a distribution with a mean of 0 and a standard deviation of 1, making different datasets comparable. Using the Z-score standardization method can better compare trends across different datasets. We added the normalized method information in the section Method and please see lines 231-233.

The trends in Fig. 2 look a bit constructed, i.e. they seem to be very sensitive to the time chosen time frame. Especially the trends in springtime (March/April) seem to be entirely caused by the ozone depletion event in 1997.

**Response:** Thank you for your comment. To rule out the excessive impact of the year 1997, we recalculated the long-term trend by excluding the 1997 data from the calculation of the 2000 trend in Figure R11. The results show that the temperature and ozone trends during the pre-2000 period are not affected by the extreme ozone depletion event, and including 1997 does not change the negative springtime temperature and ozone trends (Fig. R3).

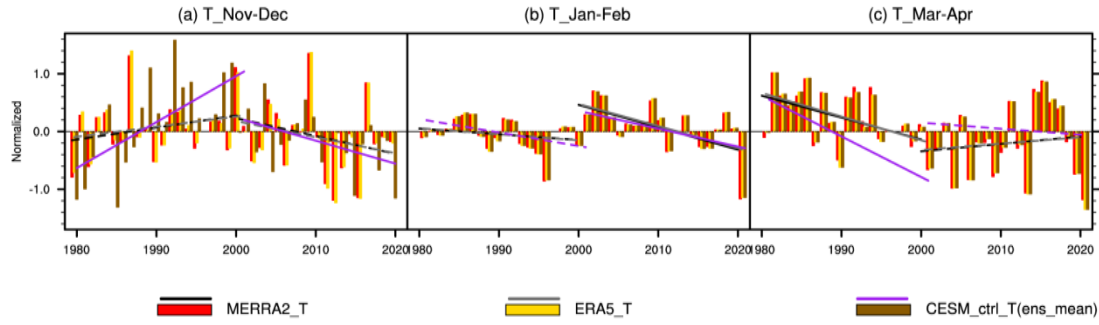

**Figure R11. Normalized time series of the temperature averaged from 150 to 10 hPa over 65°–90°N from 1980–2020 in (a) November–December, (b) January–February, and (c) March–April derived from MERRA2 (red column), ERA5 (orange column) and CESM (brown column) the ensemble control experiments. The color straight lines represent the linear trends before 2000, which excludes data for 1997, and after 2000. Solid lines indicate that the trends are statistically significant at the 90% confidence level according to Student's *t* test.**

In addition, the selection of 2000 is based on several scientific considerations: (1) Several studies provide evidence for a turning point in long-term stratospheric trends around the year 2000. Satellite observations from TOMS, OMI, and GOME reveal a turnaround in stratospheric ozone trends around 2000, with stabilization and signs of recovery (WMO, 2018; LOTUS, 2019). Ozone sonde measurements clearly indicate increased lower stratospheric ozone levels after 2000 corroborating satellite findings (IPCC, AR5, 2013). Perlwitz et al. (2008) indicated that the modeled climate response to ozone recovery is almost opposite to that of ozone depletion before 2000. These evidences point to a consensus on the year 2000 as a turning point in ozone depletion and recovery. (2) By dividing the analysis into two periods, pre- and post-2000, we can better isolate the different impacts of ozone depletion and recovery on Arctic stratospheric temperature and dynamics. While it is true that the turning point around 2000 may affect the significance of the trends, this effect is precisely one of the focuses of our study. By comparing trends before and after 2000, we aim to better understand how ozone-climate interactions evolve during the ozone depletion and recovery period.

## References:

- Bohlinger, P., Sinnhuber, B.-M., Ruhnke, R., and Kirner, O.: Radiative and dynamical contributions to past and future Arctic stratospheric temperature trends, *Atmos. Chem. Phys.*, 14, 1679–1688, <https://doi.org/10.5194/acp-14-1679-2014>, 2014.
- Brasseur, G. and Solomon, S.: *Aeronomy of the middle atmosphere: chemistry and physics of the stratosphere and mesosphere*, 3rd rev. and enlarged ed., Springer, Dordrecht; [Great Britain], 644 pp., 2005.
- Chiodo, G., Friedel, M., Seeber, S., Domeisen, D., Stenke, A., Sukhodolov, T., and Zilker, F.: The influence of future changes in springtime Arctic ozone on stratospheric and surface climate, *Atmos. Chem. Phys.*, 23, 10451–10472, <https://doi.org/10.5194/acp23-10451-2023>, 2023.
- Friedel, M., Chiodo, G., Stenke, A. et al. Springtime arctic ozone depletion forces northern hemisphere climate anomalies. *Nat. Geosci.* 15, 541–547, <https://doi.org/10.1038/s41561-022-00974-7>, 2022a.
- Friedel, M., Chiodo, G., Stenke, A., Domeisen, D. I. V., and Peter, T.: Effects of Arctic ozone on the stratospheric spring onset and its surface impact, *Atmos. Chem. Phys.*, 22, 13997–14017, <https://doi.org/10.5194/acp-22-13997-2022>, 2022b.
- Haase, S. and Matthes, K.: The importance of interactive chemistry for stratosphere-troposphere coupling, *Atmos. Chem. Phys.*, 19, 3417–3432, <https://doi.org/10.5194/acp-19-3417-2019>, 2019.
- IPCC 2014: Intergovernmental Panel on Climate Change: Climate change 2014: mitigation of climate change: Working Group III contribution to the Fifth Assessment Report of the Intergovernmental Panel on Climate Change, Cambridge University Press, New York, NY, 2014.
- Perlwitz, J., Pawson, S., Fogt, R. L., Nielsen, J. E., and Neff, W. D.: Impact of stratospheric ozone hole recovery on Antarctic climate, *Geophysical Research Letters*, 35, 2008GL033317, <https://doi.org/10.1029/2008GL033317>, 2008.

**Rieder, H. E., Chiodo, G., Fritzer, J., Wienerroither, C. & Polvani, L. M.: Is interactive ozone chemistry important to represent polar cap stratospheric temperature variability in Earth-system models? Environ. Res. Lett. 14, 044026, 2019.**

**SPARC LOTUS Activity: SPARC/IO3C/GAW Report on Long-term Ozone Trends and Uncertainties in the Stratosphere. World Climate Research Programme, 2019. 102 p. (SPARC Reports). <https://doi.org/10.17874/f899e57a20b>, 2019.**

**WMO 2022: Scientific Assessment of Ozone Depletion: 2022: [https://library.wmo.int/records/item/58360-scientific-assessment-of-ozone-depletion-2022?language\\_id=13&back=&offset=2](https://library.wmo.int/records/item/58360-scientific-assessment-of-ozone-depletion-2022?language_id=13&back=&offset=2), last access: 5 July 2024.**

**Young, P. J., Rosenlof, K. H., Solomon, S., Sherwood, S. C., Fu, Q., and Lamarque, J.-F.: Changes in Stratospheric Temperatures and Their Implications for Changes in the Brewer–Dobson Circulation, 1979–2005, J. Climate, 25, 1759–1772, <https://doi.org/10.1175/2011JCLI4048.1>, 2012.**
